# Supplementary material for: Single‐Cell Transcriptomics of Engineered Cardiac Tissues From Patient‐Specific Induced Pluripotent Stem Cell–Derived Cardiomyocytes Reveals Abnormal Developmental Trajectory and Intrinsic Contractile Defects in Hypoplastic Right Heart Syndrome
Source: PubMed Central journal article supplement — J Am Heart Assoc. 2020 Oct 16;9(20):e016528. doi: 10.1161/JAHA.120.016528 (PMC7763394; doi:10.1161/jaha.120.016528), 2020-10-16
Supplement: JAH3-9-e016528-s001.pdf [file JAH3-9-e016528-s001.pdf]

# **SUPPLEMENTAL MATERIAL**

**Table S1. Number of samples and cell batches used for functional assessment.**

| <b>A</b>             |           |           |           |         |         |         |
|----------------------|-----------|-----------|-----------|---------|---------|---------|
| Experiment           | Control 1 | Control 2 | Control 3 | PAIVS 1 | PAIVS 2 | PAIVS 3 |
| Day 7 contractility  | 37 (12)   | 40 (11)   | 24 (3)    | 42 (13) | 47 (13) | 7 (5)   |
| Day 11 contractility | 26 (10)   | 32 (9)    | 24 (3)    | 32 (11) | 39 (11) | 4 (4)   |
| Day 14 contractility | 20 (10)   | 23 (6)    | 23 (3)    | 28 (10) | 38 (11) | 3 (3)   |
| Contractile kinetics | 4 (4)     | 4 (4)     | 3 (3)     | 4 (4)   | 4 (4)   | 2 (2)   |
| Calcium sensitivity  | 5 (5)     | 4 (4)     | 3 (3)     | 6 (4)   | 6 (5)   | 2 (2)   |

  

| <b>B</b>                        |           |           |           |         |         |         |
|---------------------------------|-----------|-----------|-----------|---------|---------|---------|
| Experiment                      | Control 1 | Control 2 | Control 3 | PAIVS 1 | PAIVS 2 | PAIVS 3 |
| Electrophysiological Parameters | 4         | 4         | 3         | 3       | 5       | 3       |

(A) Table showing number of samples (number of cell batches) used for each experiment for hCTS. (B) Table showing number of samples used for each experiment for hCAS.

**Table S2. List of forward and reverse primers used in RT-qPCR.**

| Gene           | Forward Sequence       | Reverse Sequence       |
|----------------|------------------------|------------------------|
| <i>ACTN2</i>   | GTACGTCTCTTGCTTCTACCAC | CTCCATCAGCCTCTCATTCTC  |
| <i>CSRP3</i>   | GAAGTTTGGAGAGTCCGAGAAG | ATGGCACAGCGAAACA       |
| <i>FHL2</i>    | GTGGCAGTAGTCTGTGGAATAA | GTCACTGATGCTCCATTCTAA  |
| <i>HOPX</i>    | GCAGATCCGTCACAGACTAAG  | GTTAAGCGGAGGAGAGAAACA  |
| <i>MYH6</i>    | CAGCACAGAGCTCTTCAAGC   | GTCCGAGATTTCTCTGAA     |
| <i>MYH7</i>    | GAGACTGTGCTGGGCTTGTA   | CTTCTCAATAGCGCATCAG    |
| <i>MYL2</i>    | CAGAACAGGGATGGCTTCAT   | CGGAGCCTCCTTGATCATT    |
| <i>NPPA</i>    | ATGAGCTCCTTCTCCACCAC   | TCCAGCAAATCTTGAAATCC   |
| <i>NPPB</i>    | TCCTGCTCTTCTTGCATCTG   | GTAACCCGGACGTTTCCAA    |
| <i>PDLIM3</i>  | TGCGCAGGACAGGATTAAG    | GGGCTTTCCCATCTTCAGATAC |
| <i>SORBS2</i>  | GAGCTGTGACGATCTCCTAAAC | CTTGGAGTCTCCTCACATAAC  |
| <i>SYNPO2L</i> | CTCTTCCGTCTAAGGCATGAAT | TCCCAAAGTGCTGGGATTAC   |
| <i>TCAP</i>    | GGGCAGAATGGAAGGATCTG   | TGGTGGTAGGTCTCATGTCT   |
| <i>TMSB4X</i>  | GAAGAAGACAGAGACGCAAGAG | GAAGGCAATGCTTGTGGAATG  |
| <i>TNNT2</i>   | AAGAGGCAGACTGAGCGGAAA  | AGATGCTCTGCCACAGCTCCT  |
| <i>TPM1</i>    | TGCTTCACTTCTCCCAAGAC   | GCAGGATGCTAAGAGAGAGAAC |

**Figure S1. An illustrated overview of this study.**

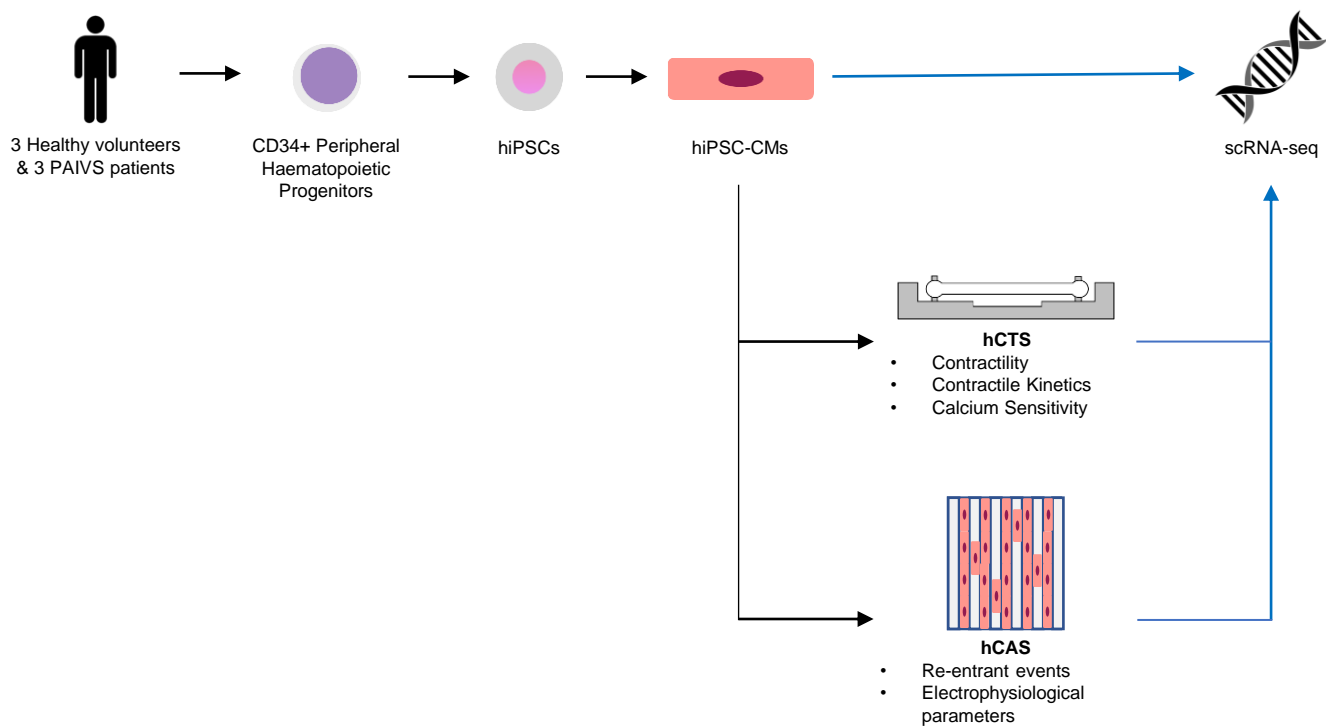

**Figure S2. Validation of hiPSCs with immunostaining of pluripotency markers.**

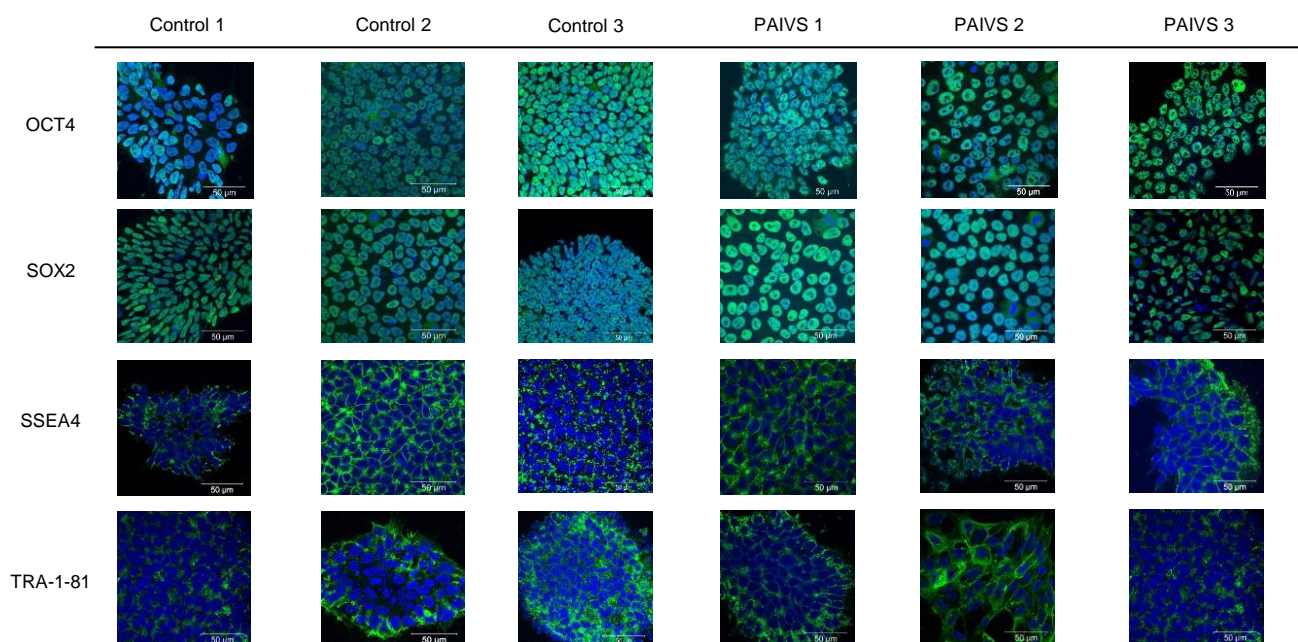

Immunostaining showing the expression of pluripotency protein markers (OCT4, SOX2, SSEA4, TRA-1-81) for putative hiPSC clones reprogrammed from blood samples of three healthy controls and three PAIVS patients.

**Figure S3. Average percentage of cTnT+ cells at day 14 post-differentiation for all control and PAIVS cell lines.**

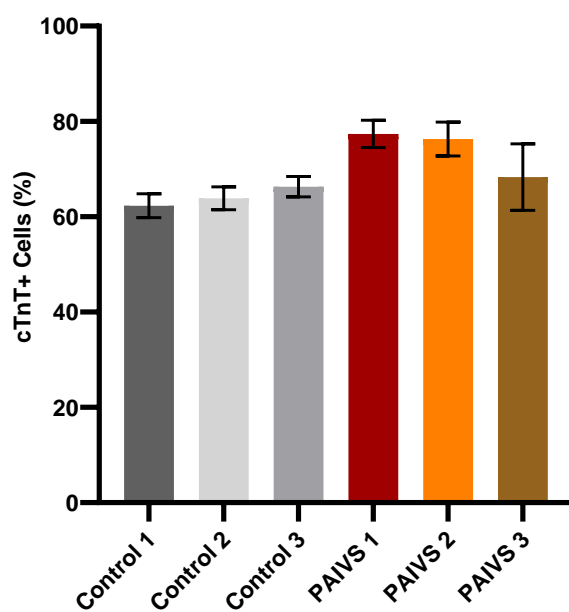

*n* = 13 for Control 1, *n* = 12 for Control 2, *n* = 6 for Control 3, *n* = 13 for PAIVS 1, *n* = 13 for PAIVS 2, *n* = 6 for PAIVS 3. Error bars represented as mean  $\pm$  SEM.
